# Supplementary material
Source: Royal Society of Chemistry journal article supplement (doi:10.1039/d6ta00815a)
Supplement: d6ta00815a1.pdf [file d6ta00815a1.pdf]

## Supplementary Materials for

**Preparation of Waterborne Polyurethane/ Silsesquioxane /Carbon Nanotubes Aerogel with Rigid-Flexible Framework for Mechanically Tough and Wide Pressure-Range Properties for High-Performance Piezoresistive Sensing**

### Corresponding Author

**Hongzhi Liu\*** — Email: liuhongzhi@sdu.edu.cn

### This file includes:

Supplementary Text

Figs. S1 to S5

Tables S1 to S5

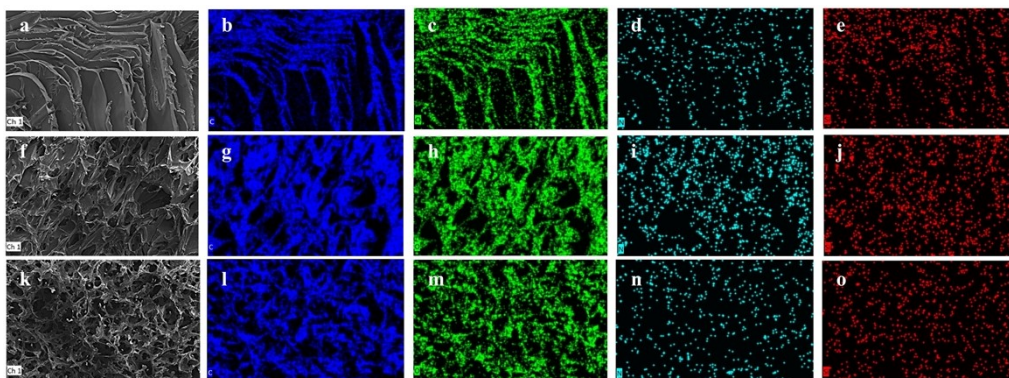

**Fig. S1.** EDS elemental mapping: (a–e) WPU-HSQ<sub>8</sub> aerogel, (f–j) and (k–o) WPU-HSQ<sub>8</sub>/CNTs composite aerogel before and after compression state.

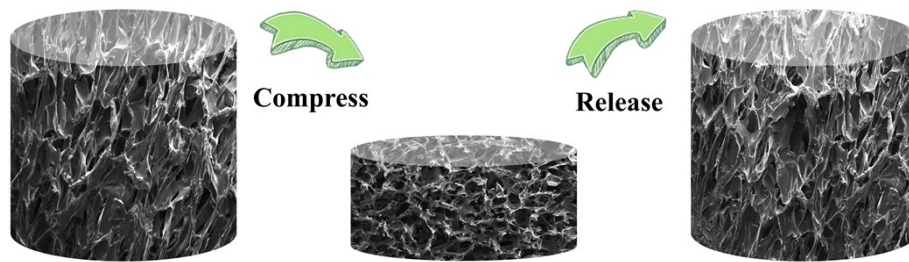

**Fig. S2.** Schematic diagram of the cyclic compression of WPU-HSQ<sub>8</sub>/CNTs composite aerogel

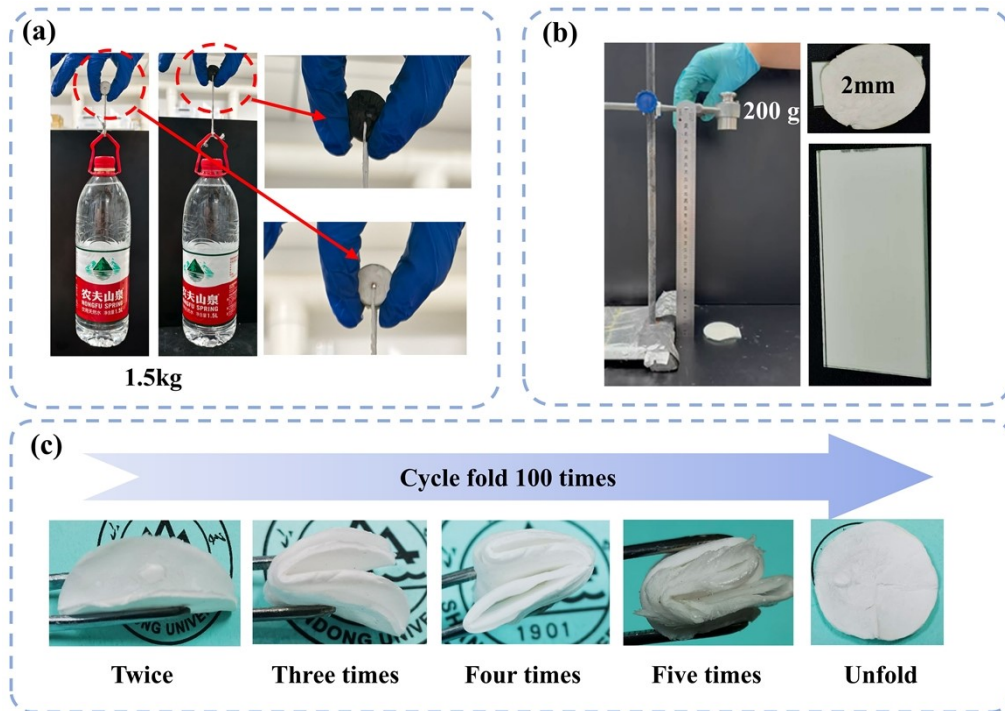

**Fig. S3.** Integrated performance demonstrations of the WPU-HSQ aerogel: (a) load-bearing (1.5 kg), (b) impact protection, and (c) folding durability (100 cycles).

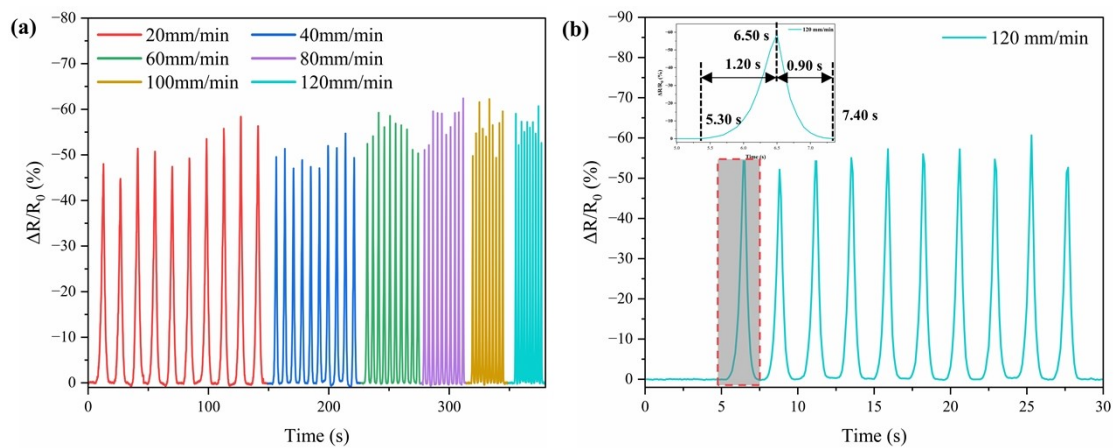

**Fig. S4.** Performance of the WPU-HSQ<sub>8</sub>/CNTs sensor under low-rate cycling: (a) resistance response and (b) corresponding response time.

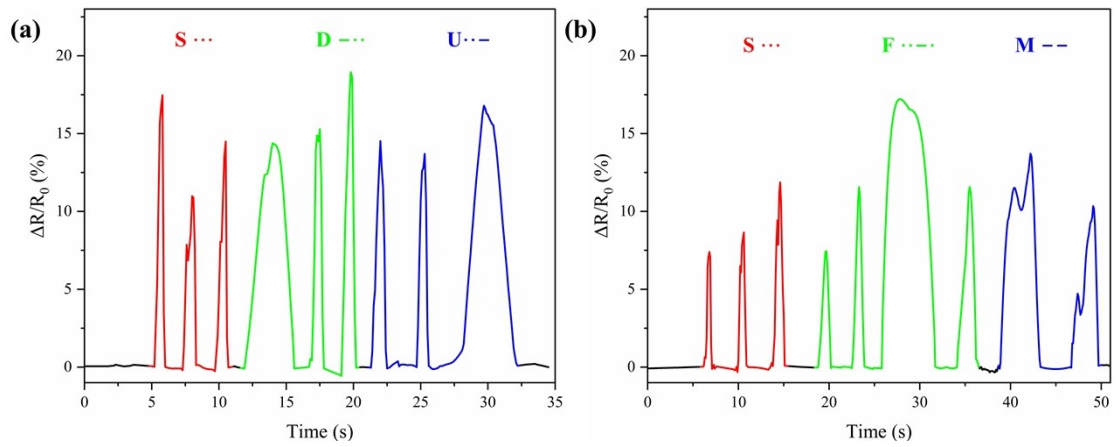

**Fig. S5.** Dynamic resistance signals in response to pressing the Morse code for “SDU” and “SFM”.

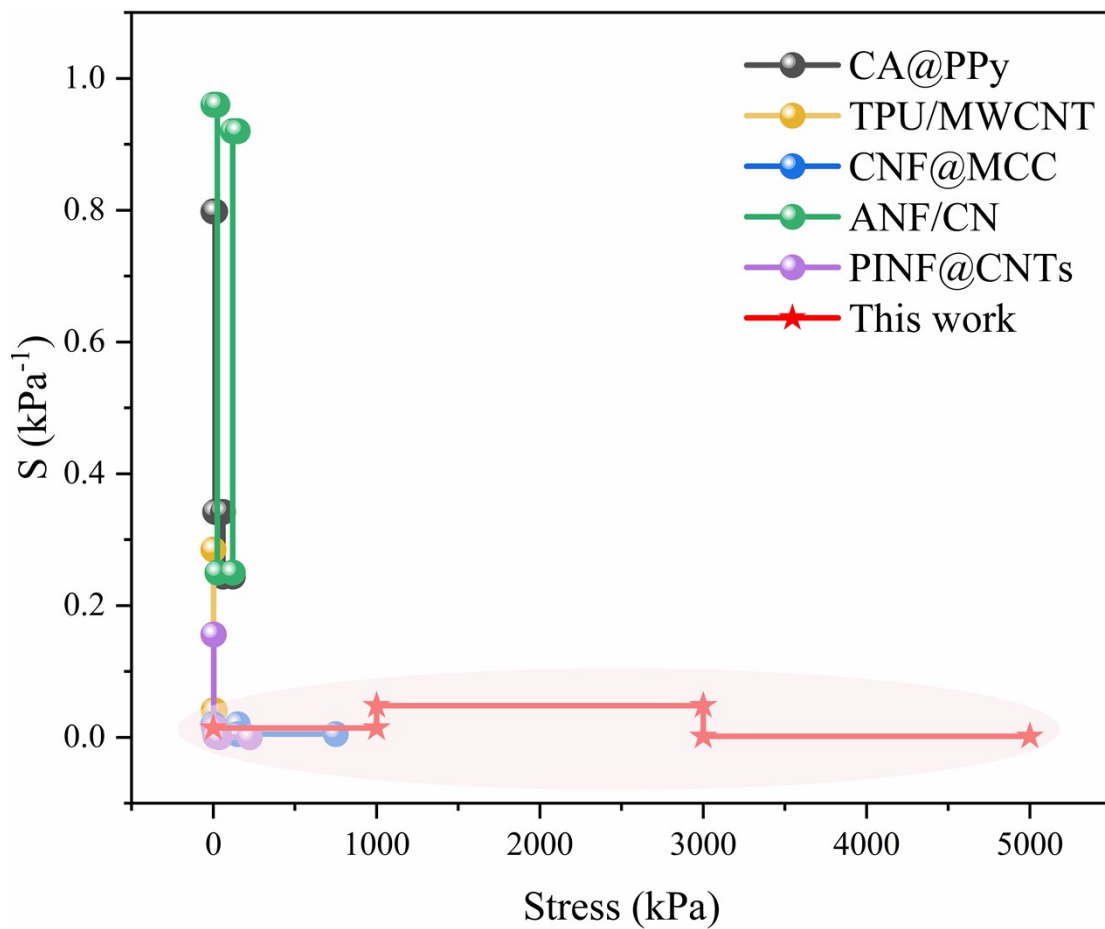

**Table S1.** Formulation of the WPU-HSQ composite

| <b>Samples</b>             | <b>PCDL2000</b> | <b>DMBA</b> | <b>HMDI</b> | <b>TEA</b> | <b>HSQ</b> |
|----------------------------|-----------------|-------------|-------------|------------|------------|
| <b>WPU-HSQ<sub>7</sub></b> | 6               | 0.5402      | 2.4625      | 0.3689     | 0.7061     |
| <b>WPU-HSQ<sub>8</sub></b> | 6               | 0.5402      | 2.4625      | 0.3689     | 0.8157     |
| <b>WPU-HSQ<sub>9</sub></b> | 6               | 0.5402      | 2.4625      | 0.3689     | 0.9278     |

**Table S2.** Deconvolution of the FTIR spectra in the carbonyl stretching region of WPU-HSQ<sub>x</sub>.

| Sample               | Wavenumbers (cm <sup>-1</sup> ) / C=O Fraction (%) |                         |                   | X <sub>b</sub> (%) |
|----------------------|----------------------------------------------------|-------------------------|-------------------|--------------------|
|                      | C=O, Free                                          | C=O, HB (Disordered)    | C=O, HB (Ordered) |                    |
| WPU-HSQ <sub>7</sub> | 1743/80.44                                         | 1714/6.43               | 1701/13.13        | 12.45              |
| WPU-HSQ <sub>8</sub> | 1744/68.15                                         | 1724/3.42<br>1712/13.67 | 1698/14.76        | 21.45              |
| WPU-HSQ <sub>9</sub> | 1743/74.74                                         | 1720/3.80<br>1708/10.59 | 1695/10.87        | 16.50              |

The relative concentration of hydrogen-bonded carbonyls is represented by X<sub>b</sub>, which can be determined using the formula:

$$X_b(\%) = \frac{[(A_D + A_O)/1.71]}{[A_F + (A_D + A_O)/1.71]} \times 100\% \quad (1)$$

where A<sub>O</sub> represents the peak area of an ordered hydrogen bond-bound carbonyl characteristic peak, A<sub>F</sub> represents the peak area of a free carbonyl characteristic peak, and A<sub>D</sub> represents the peak area of a disordered hydrogen bond-bound carbonyl characteristic peak. Meanwhile, the Beer-Lambert law equation indicates that α<sub>HB</sub>/α<sub>F</sub>=1.71 since the extinction coefficients of free carbonyl (α<sub>F</sub>) and hydrogen bonded carbonyl (α<sub>HB</sub>) differ.

**Table S3.** Porosity parameters of the WPU-HSQ8 and WPU-HSQ<sub>8</sub>/CNTs composite aerogels.

| <b>Sample</b>         | <b>Bulk density<br/>(g/cm<sup>3</sup>)</b> | <b>Apparent density<br/>(g/cm<sup>3</sup>)</b> | <b>Porosity<br/>(%)</b> | <b>Average pore size<br/>(nm)</b> | <b>Total hole area<br/>(m<sup>2</sup>/g)</b> |
|-----------------------|--------------------------------------------|------------------------------------------------|-------------------------|-----------------------------------|----------------------------------------------|
| <b>WPU-HSQ-8</b>      | 0.2498                                     | 1.0132                                         | 87.51                   | 19800                             | 8.125                                        |
| <b>WPU-HSQ-8/CNTs</b> | 0.4434                                     | 1.0418                                         | 77.83                   | 27220                             | 9.0410                                       |

**Table S4.** Thermal degradation parameters of WPU-HSQ<sub>8</sub> and WPU-HSQ<sub>8</sub>/CNTs composite aerogels.

| <b>Samples</b>                  | <b>T<sub>5%</sub> (°C)</b> | <b>T<sub>50%</sub> (°C)</b> | <b>T<sub>max1</sub> (°C)</b> | <b>T<sub>max2</sub> (°C)</b> | <b>Residual carbon content</b> |
|---------------------------------|----------------------------|-----------------------------|------------------------------|------------------------------|--------------------------------|
| <b>WPU-HSQ<sub>0</sub></b>      | 233.20                     | 328.44                      | 343.53                       | -                            | 0.33%                          |
| <b>WPU-HSQ<sub>7</sub></b>      | 272.08                     | 367.45                      | 337.29                       | 422.53                       | 1.51%                          |
| <b>WPU-HSQ<sub>8</sub></b>      | 287.17                     | 377.55                      | 342.26                       | 427.54                       | 2.37%                          |
| <b>WPU-HSQ<sub>9</sub></b>      | 267.10                     | 392.58                      | 337.31                       | 427.55                       | 7.44%                          |
| <b>WPU-HSQ<sub>7</sub>/CNTs</b> | 267.12                     | 372.56                      | 337.31                       | 427.56                       | 5.63%                          |
| <b>WPU-HSQ<sub>8</sub>/CNTs</b> | 257.07                     | 377.48                      | 327.26                       | 427.50                       | 6.91%                          |
| <b>WPU-HSQ<sub>9</sub>/CNTs</b> | 287.18                     | 377.53                      | 337.19                       | 422.49                       | 10.71%                         |

**Table S5.** Mechanical property parameters of WPU-HSQ<sub>8</sub> and WPU-HSQ<sub>8</sub>/CNTs composite aerogels.

| <b>Samples</b>                  | <b>Compression pressure<br/>(MPa)</b> | <b>Resilience<br/>(kJ/m<sup>3</sup>)</b> | <b>Young's modulus<br/>(MPa)</b> |
|---------------------------------|---------------------------------------|------------------------------------------|----------------------------------|
| <b>WPU-HSQ<sub>7</sub></b>      | 2.24                                  | 294.40                                   | 0.47                             |
| <b>WPU-HSQ<sub>8</sub></b>      | 3.43                                  | 536.40                                   | 0.90                             |
| <b>WPU-HSQ<sub>9</sub></b>      | 2.98                                  | 448.19                                   | 0.81                             |
| <b>WPU-HSQ<sub>7</sub>/CNTs</b> | 4.35                                  | 508.53                                   | 1.08                             |
| <b>WPU-HSQ<sub>8</sub>/CNTs</b> | 4.61                                  | 731.16                                   | 1.66                             |
| <b>WPU-HSQ<sub>9</sub>/CNTs</b> | 4.76                                  | 716.65                                   | 1.73                             |
